# Supplementary material for: In situ X-ray-assisted electron microscopy staining for large biological samples
Source: eLife journal article supplement (doi:10.7554/elife.72147), 2022-10-20

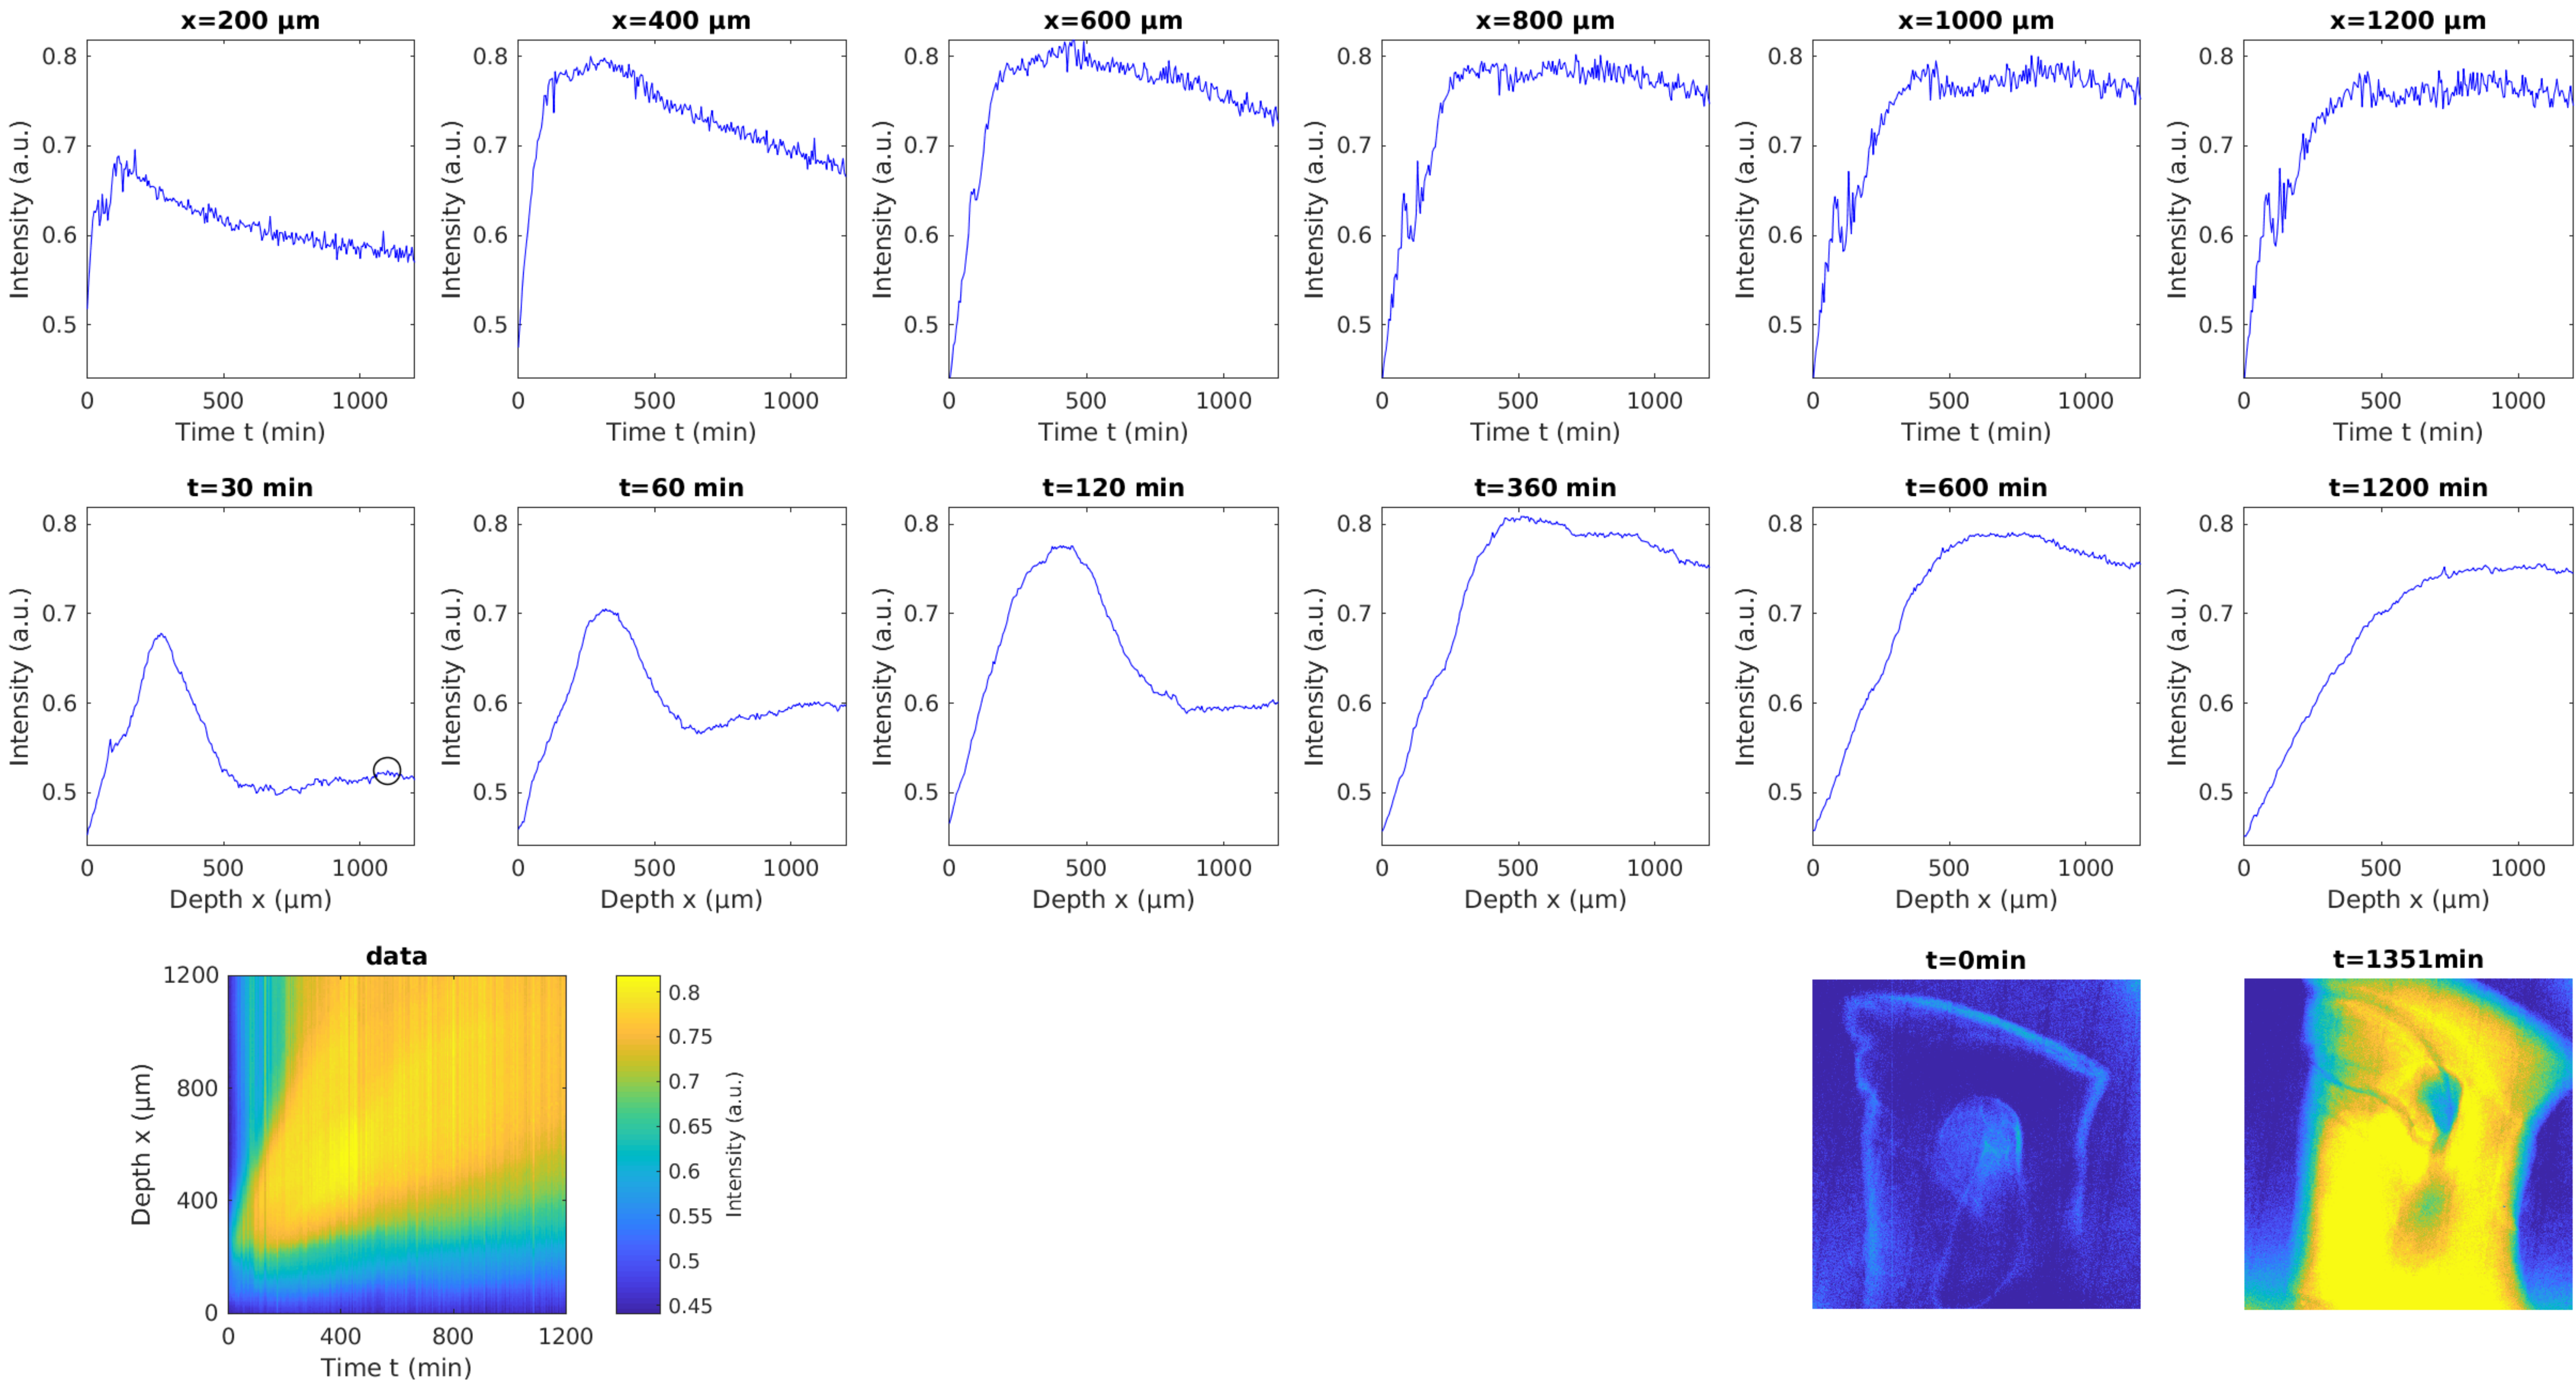



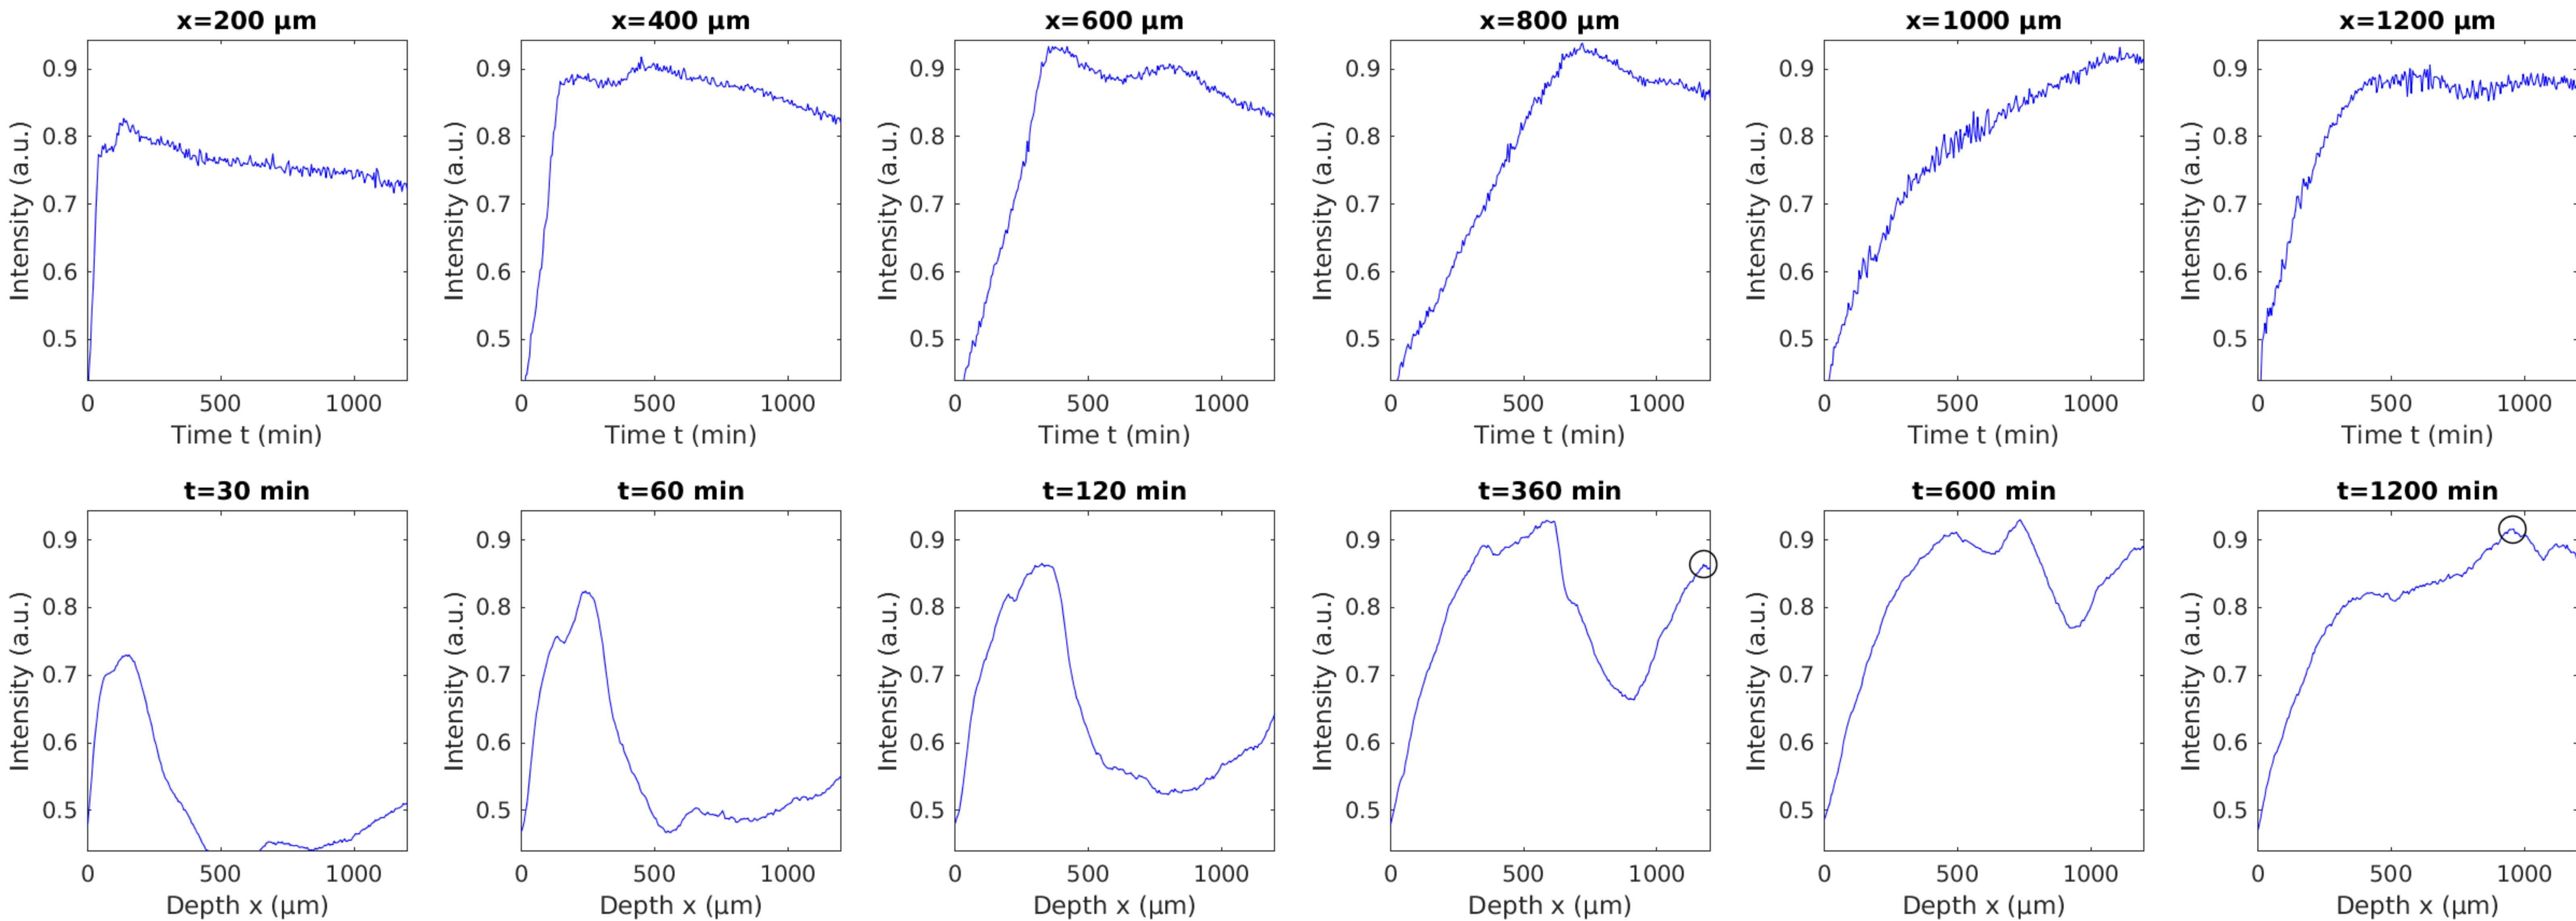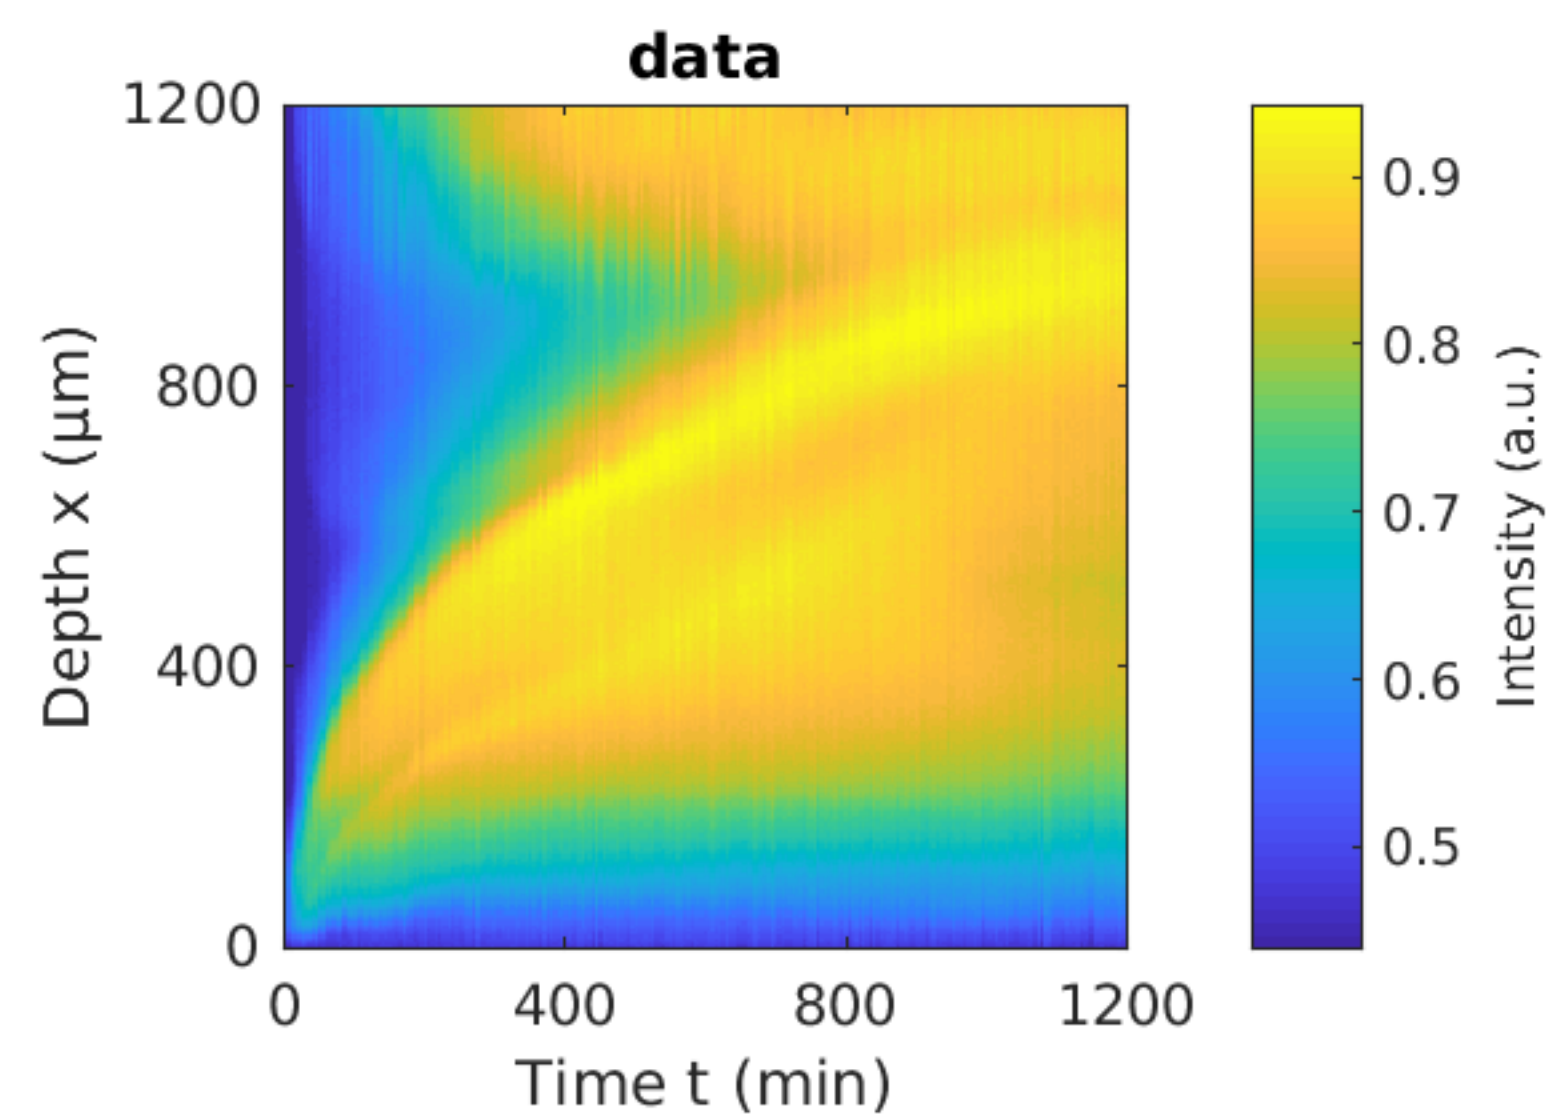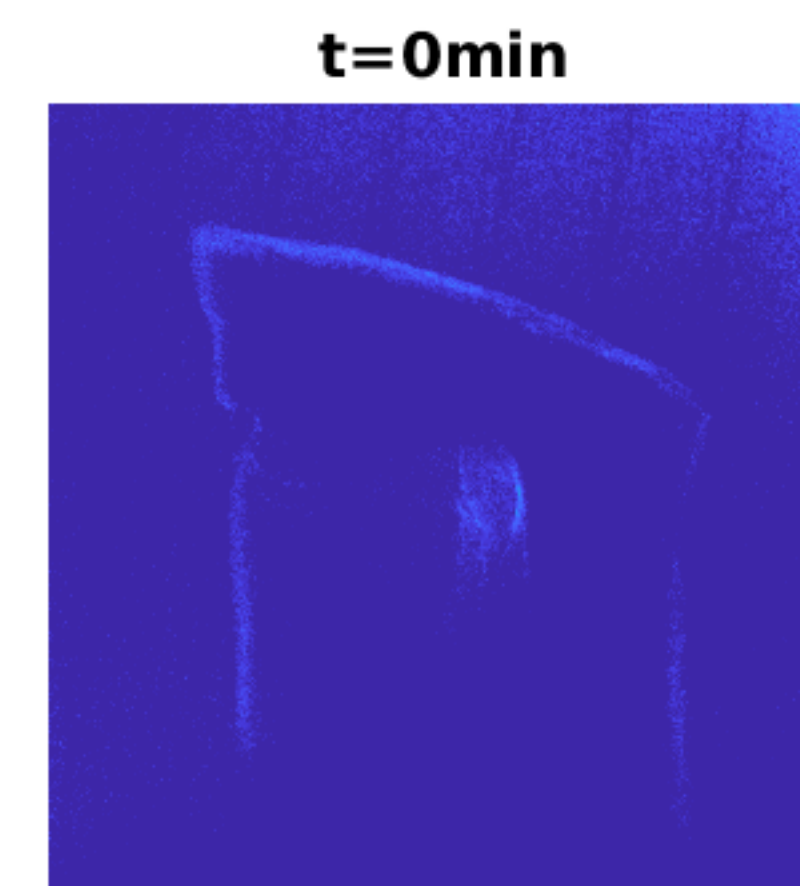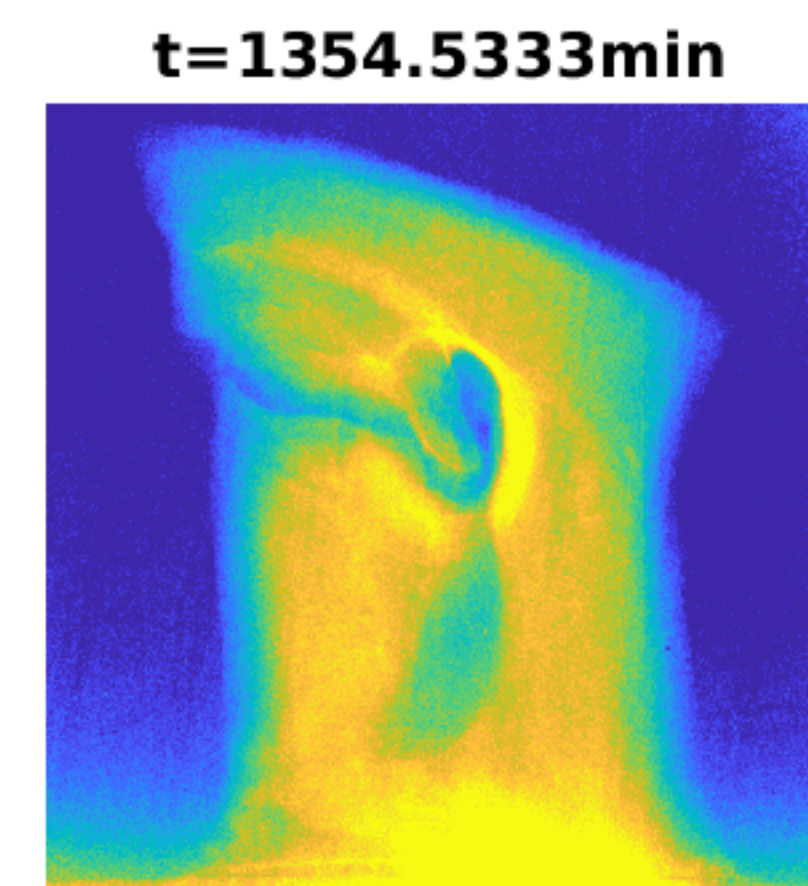



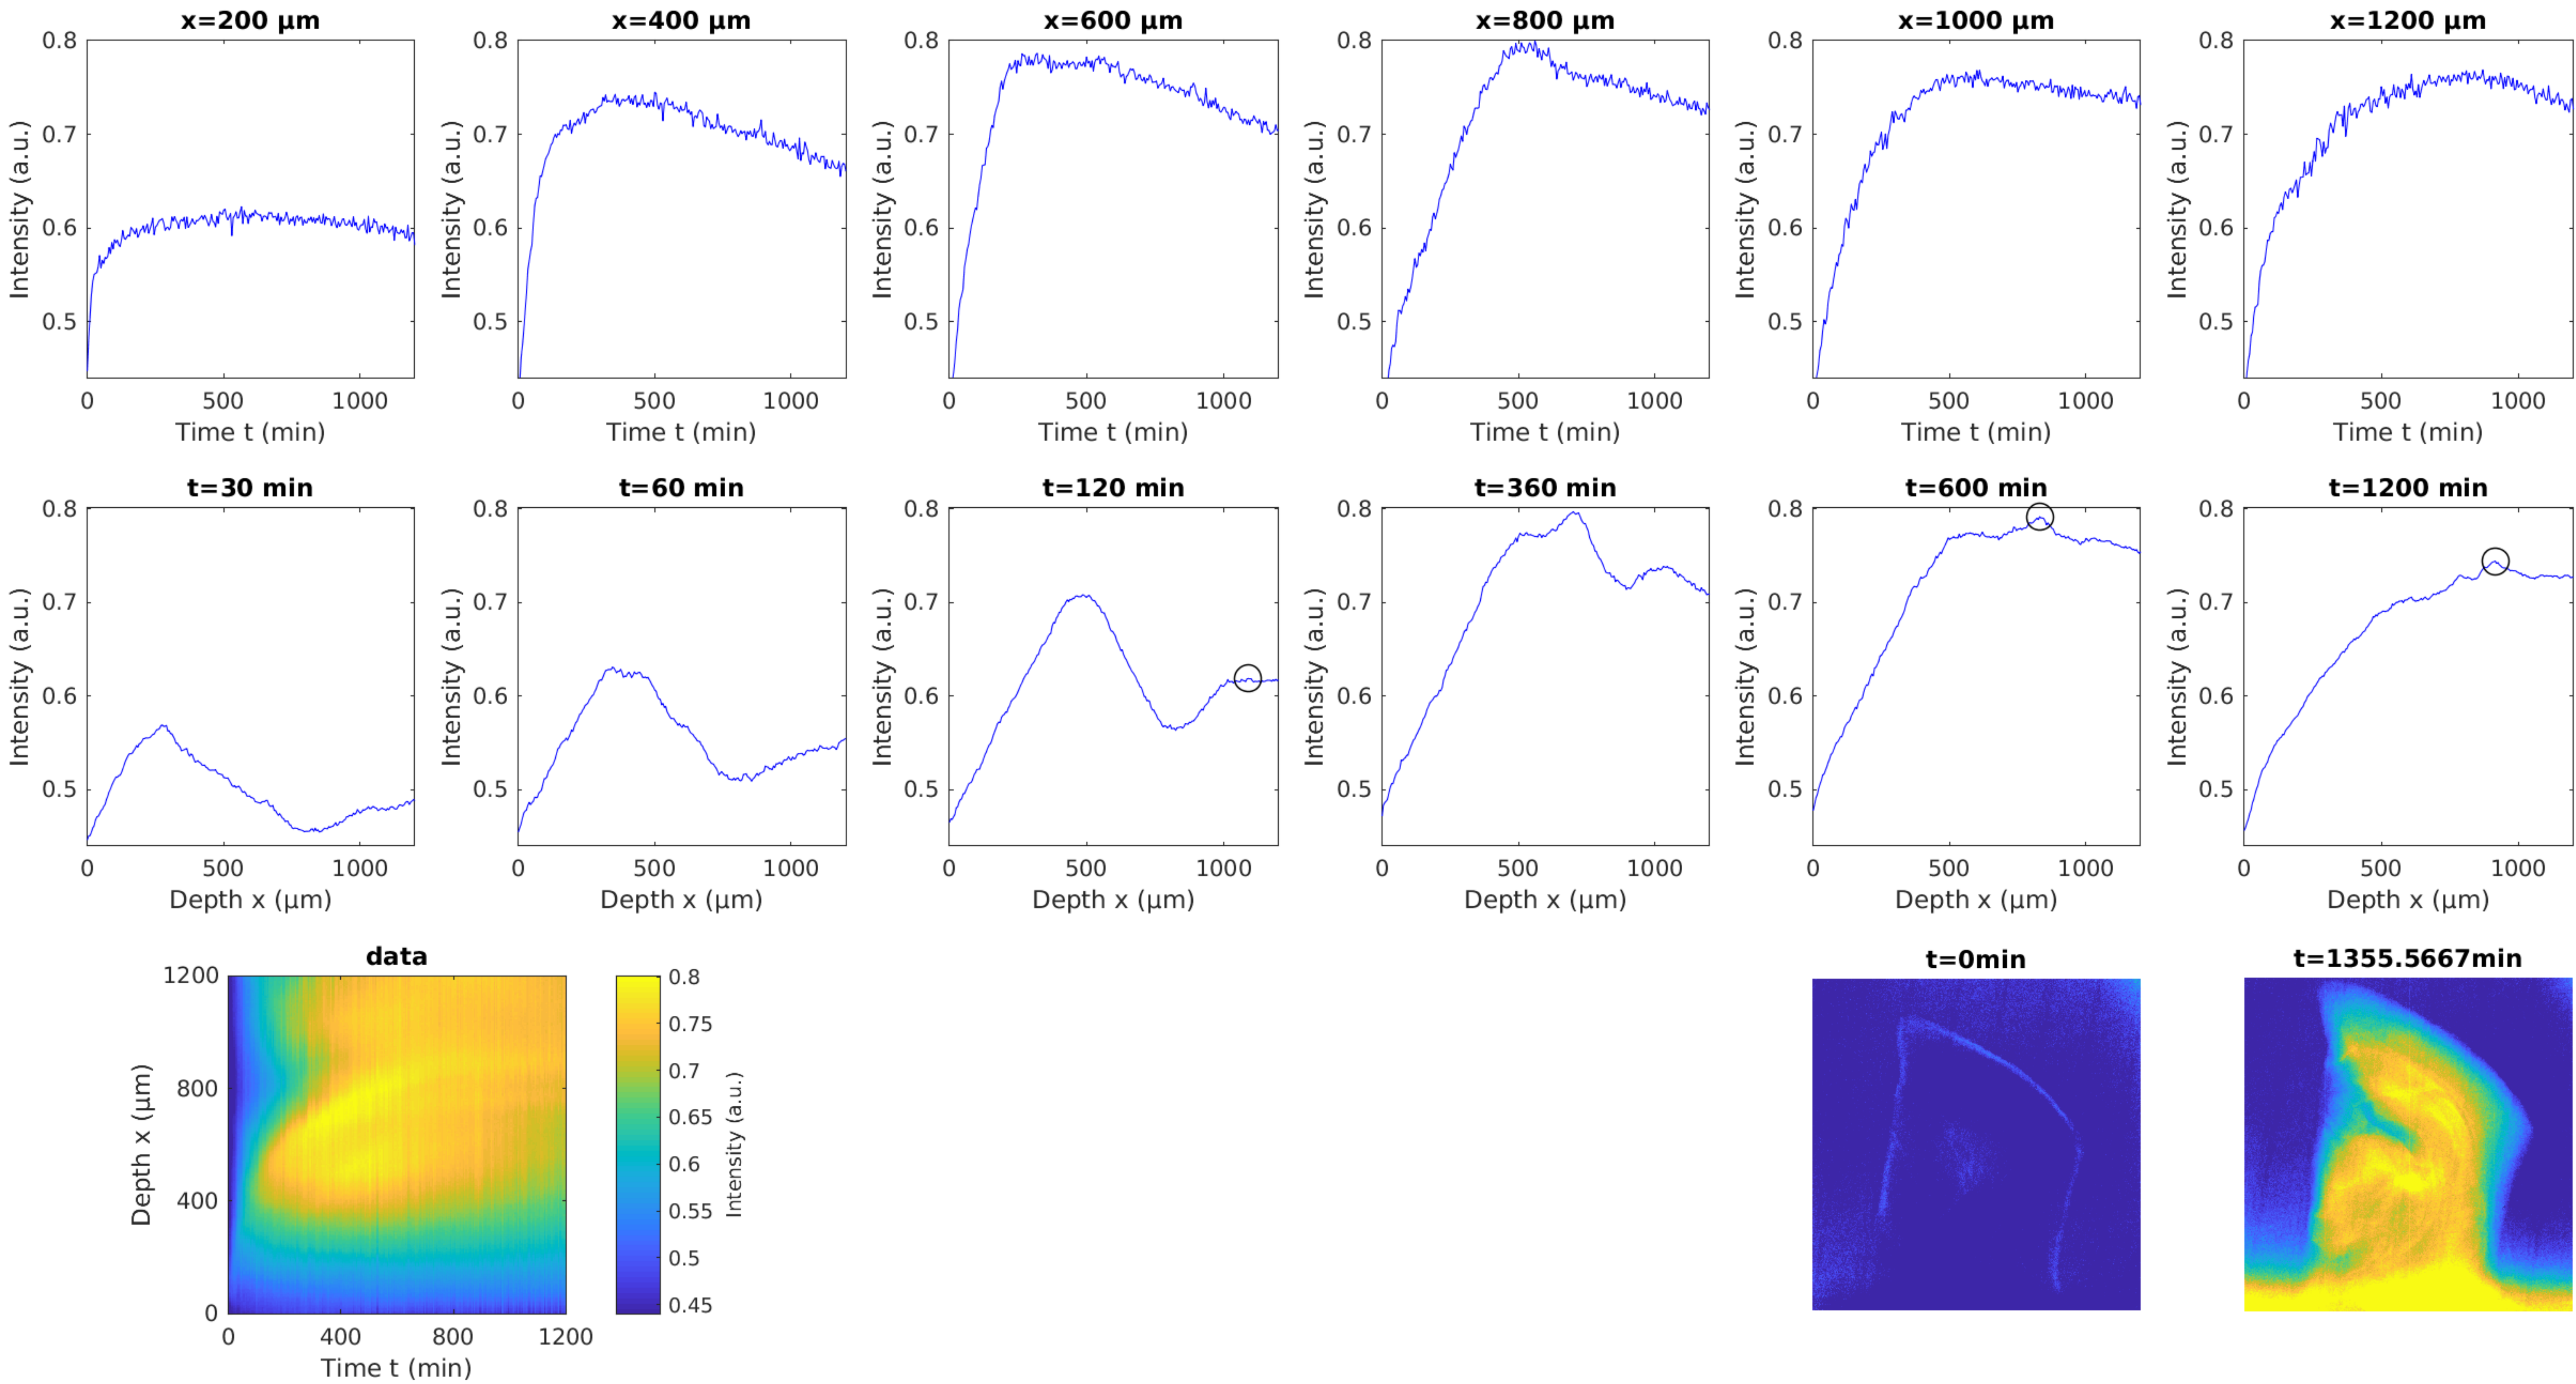



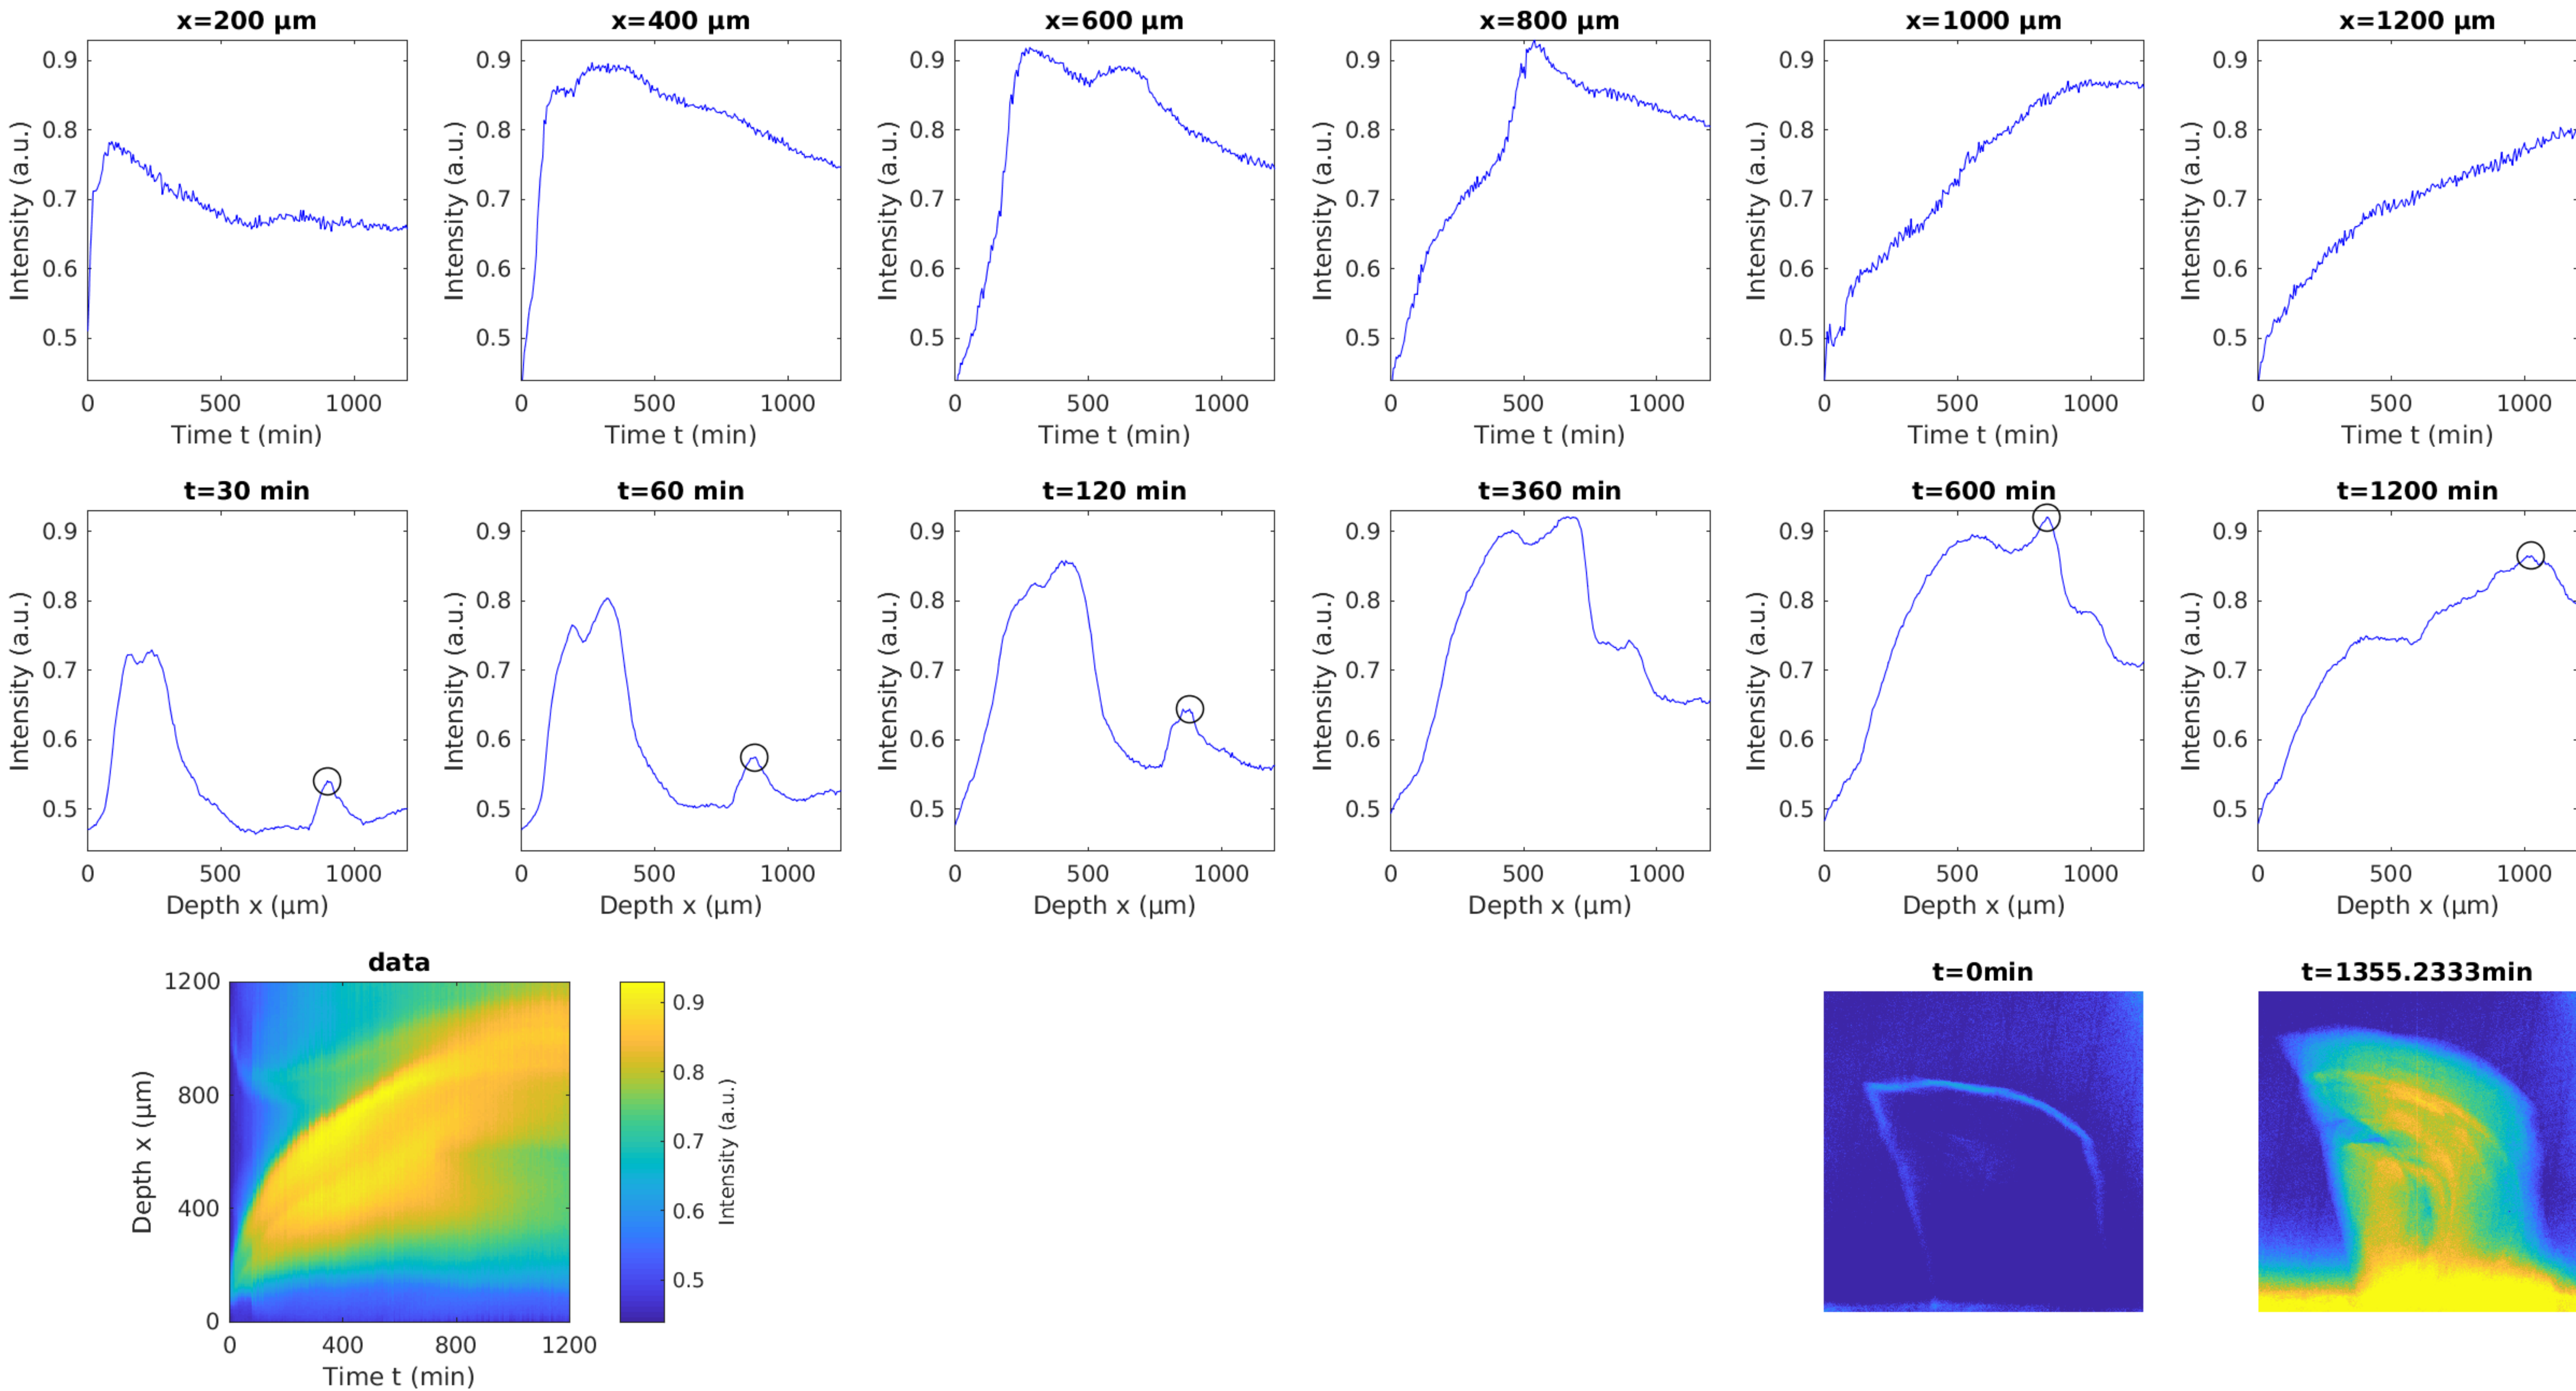

Supplement: supp [file elife-72147-supp-v1.zip]
